# Supplementary material for: Aqueous phase hydrogenation of furfural to tetrahydrofurfuryl alcohol on alkaline earth metal modified Ni/Al2O3
Source: Royal Society of Chemistry journal article supplement (doi:10.1039/c6ra05680f), 2016-01-01
Supplement: c6ra05680f1.pdf [file c6ra05680f1.pdf]

Electronic Supplementary Information

**Aqueous phase hydrogenation of furfural to tetrahydrofurfuryl alcohol on alkaline earth metals modified Ni/Al<sub>2</sub>O<sub>3</sub>**

Yanliang Yang,<sup>a,b</sup> Jiping Ma,<sup>a</sup> Xiuquan Jia,<sup>a,c</sup> Zhongtian Du,<sup>a</sup> Ying Duan,<sup>b</sup> and Jie Xu<sup>\*a</sup>

*<sup>a</sup>State Key Laboratory of Catalysis, Dalian National Laboratory for Clean Energy, Dalian Institute of Chemical Physics, Chinese Academy of Sciences, Dalian 116023, P. R. China. E-mail: xujie@dicp.ac.cn, Fax: +86-411-8437-9245; Tel: +86-411-8437-9245*

*<sup>b</sup>College of Chemistry and Chemical Engineering, Luoyang Normal University, Luoyang 471022, P. R. China.*

*<sup>c</sup>University of the Chinese Academy of Sciences, Beijing 100049, P. R. China*

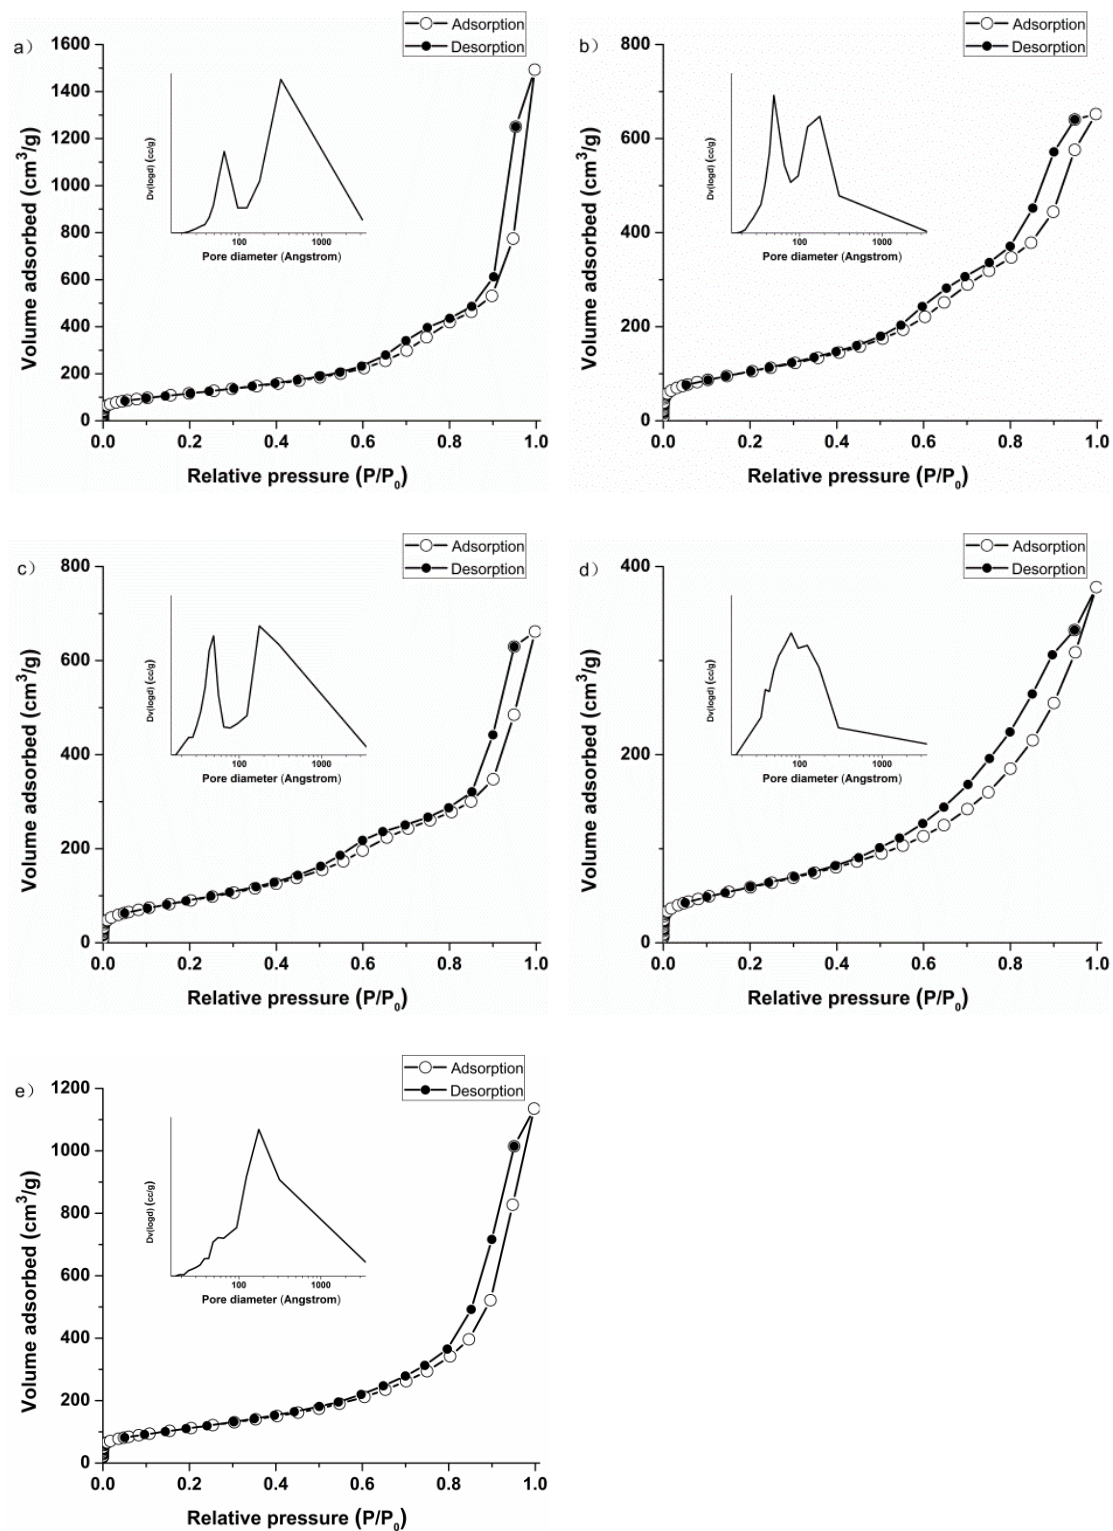

Fig. S1 N<sub>2</sub> adsorption/desorption isotherms of as-synthesized a) Al<sub>2</sub>O<sub>3</sub>; b) Mg-Al<sub>2</sub>O<sub>3</sub>; c) Ca-Al<sub>2</sub>O<sub>3</sub>; d) Sr-Al<sub>2</sub>O<sub>3</sub>; e) Ba-Al<sub>2</sub>O<sub>3</sub>.

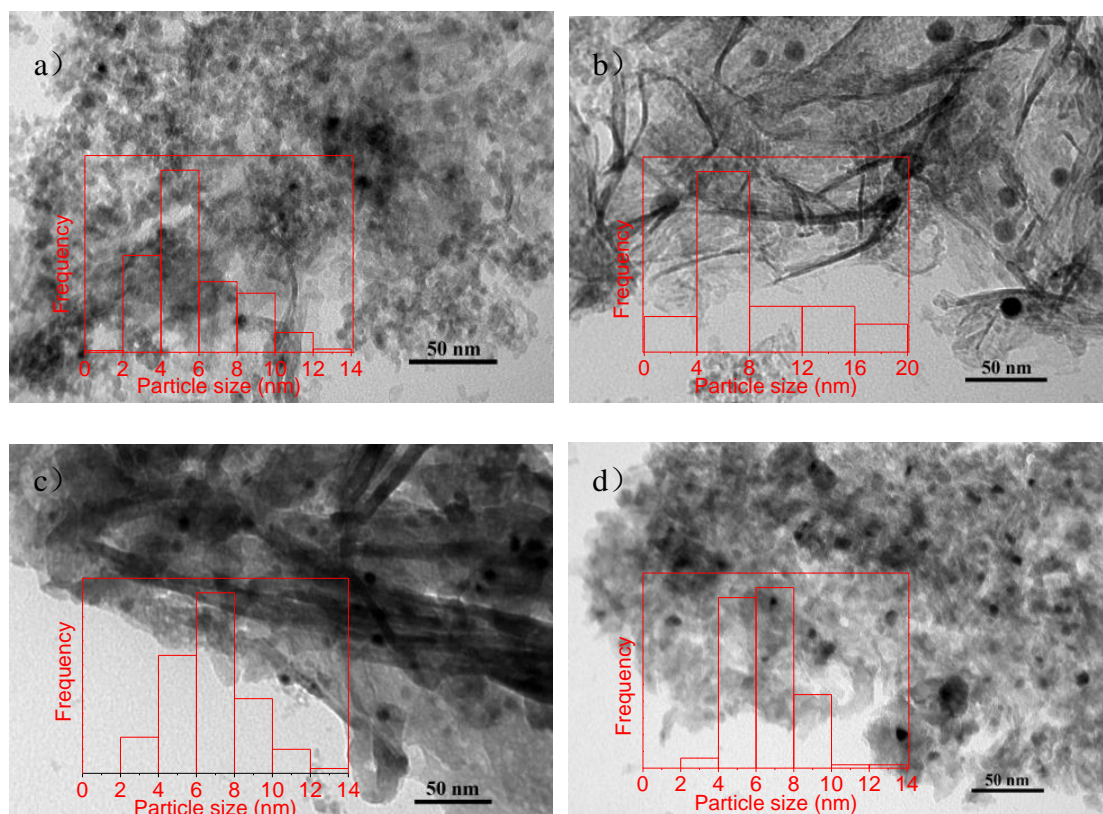

Fig. S2 TEM images of nickel-based catalysts a) Ni/Al<sub>2</sub>O<sub>3</sub>; b) Ni/Mg-Al<sub>2</sub>O<sub>3</sub>; c) Ni/Ca-Al<sub>2</sub>O<sub>3</sub>; d) Ni/Sr-Al<sub>2</sub>O<sub>3</sub>.

Table S1 Binding energy and relative area of nickel-based catalysts

| Samples                              | Ni            |              | NiO           |              | NiAl <sub>2</sub> O <sub>4</sub> |              |
|--------------------------------------|---------------|--------------|---------------|--------------|----------------------------------|--------------|
|                                      | B. E.<br>(eV) | R. A.<br>(%) | B. E.<br>(eV) | R. A.<br>(%) | B. E.<br>(eV)                    | R. A.<br>(%) |
| Ni/Al <sub>2</sub> O <sub>3</sub>    | 852.9         | 9.0          | 855.4         | 29.0         | 856.8                            | 62.0         |
| Ni/Mg-Al <sub>2</sub> O <sub>3</sub> | 852.7         | 11.4         | 855.2         | 32.2         | 856.7                            | 56.4         |
| Ni/Ca-Al <sub>2</sub> O <sub>3</sub> | 852.6         | 10.7         | 855.2         | 35.1         | 856.7                            | 54.2         |
| Ni/Sr-Al <sub>2</sub> O <sub>3</sub> | 852.5         | 13.1         | 855.2         | 38.6         | 856.8                            | 48.3         |
| Ni/Ba-Al <sub>2</sub> O <sub>3</sub> | 852.4         | 12.7         | 855.0         | 38.8         | 856.7                            | 48.5         |

B. E.: Binding energy, R. A.: relative area

Table S2 The leaching of Ni and Ba after each cycle. <sup>a</sup>

| Leaching of Ni<br>or Ba (%) | 1     | 2    | 3    | 4    |
|-----------------------------|-------|------|------|------|
| Ni                          | n.d.  | n.d. | n.d. | n.d. |
| Ba                          | 13.20 | 0.39 | 0.40 | 0.37 |

<sup>a</sup> Calculated from the ICP-AES experiments based on the fresh catalyst. n.d. refers to not detected.
